# Supplementary material for: Surface acoustic wave diffraction driven mechanisms in microfluidic systems
Source: Royal Society of Chemistry journal article supplement (doi:10.1039/c8lc00243f), 2018-01-01
Supplement: c8lc00243f1.pdf [file c8lc00243f1.pdf]

**Table 1** Parameters used in numerical simulations (Material properties are at  $T = 25^\circ\text{C}$ ).

| <b>Water</b>                                           |                 |                                         |
|--------------------------------------------------------|-----------------|-----------------------------------------|
| Density <sup>1</sup>                                   | $\rho_0$        | 997 kg m <sup>-3</sup>                  |
| Speed of sound <sup>1</sup>                            | $c_0$           | 1497 m s <sup>-1</sup>                  |
| Shear viscosity <sup>1</sup>                           | $\eta$          | 0.890 mPa s                             |
| Bulk viscosity <sup>2</sup>                            | $\eta'$         | 2.47 mPa s                              |
| Compressibility <sup>2</sup>                           | $\kappa_0$      | 448 TPa <sup>-1</sup>                   |
| Viscous boundary layer (@ 180 MHz) <sup>a</sup>        | $\delta_v$      | 39.7322 nm                              |
| Thermal conductivity <sup>2</sup>                      | $k_{th}$        | 0.603 W m <sup>-1</sup> K <sup>-1</sup> |
| Specific heat capacity <sup>2</sup>                    | $C_p$           | 4183 J kg <sup>-1</sup> K <sup>-1</sup> |
| Thermal expansion coefficient <sup>2</sup>             | $\alpha_{th}$   | $2.97 \times 10^{-4}$ K <sup>-1</sup>   |
| <b>Lithium Niobate (128° YX-cut LiNbO<sub>3</sub>)</b> |                 |                                         |
| Speed of sound                                         | $c_{LN}$        | 3994 m s <sup>-1</sup>                  |
| Density                                                | $\rho_{LN}$     | 4700 kg m <sup>-3</sup>                 |
| <b>Poly-dimethylsiloxane (PDMS; 10:1)</b>              |                 |                                         |
| Density <sup>b</sup>                                   | $\rho_{PDMS}$   | 1030 kg m <sup>-3</sup>                 |
| Speed of sound <sup>3</sup>                            | $c_{PDMS}$      | 1076.5 m s <sup>-1</sup>                |
| <b>SAW actuation parameters</b>                        |                 |                                         |
| SAW wavelength                                         | $\lambda_{SAW}$ | 21 μm                                   |
| Excitation frequency <sup>e</sup>                      | $f$             | 190.19 MHz                              |
| Voltage potential                                      | $V_0$           | 1 V                                     |

<sup>a</sup> Calculated as  $\delta_v = \sqrt{\frac{2\eta}{\rho_0\omega}}$ .

<sup>b</sup> As provided by the supplier product data sheet (Sylgard<sup>®</sup> 184 Silicone Elastomer).

<sup>c</sup> As provided by the supplier product data sheet (Sigma-Aldrich<sup>®</sup>).

<sup>d</sup> Calculated as  $\kappa_p = \frac{3(1-\sigma_p)}{1+\sigma_p} \frac{1}{(\rho_p c_p^2)}$

<sup>e</sup> Calculated as  $f = \frac{c_{LN}}{\lambda_{SAW}}$

Note: The PDMS used experimentally consists of a 10:1 mixing ratio (i.e. 10 parts base and 1 part curing agent). The material properties used correspond to this mixing ratio.

## References

- 1 W. M. Haynes, *CRC handbook of chemistry and physics*, CRC press, 2014.
- 2 P. B. Muller, R. Barnkob, M. J. H. Jensen and H. Bruus, *Lab on a Chip*, 2012, **12**, 4617–4627.
- 3 J. K. Tsou, J. Liu, A. I. Barakat and M. F. Insana, *Ultrasound in Medicine and Biology*, 2008, **34**, 963–972.
